# Supplementary material
Source: MDPI journal article supplement (https://www.mdpi.com/2311-5637/9/1/77)
Supplement: s1 [file s1]

Supplimentary figure:

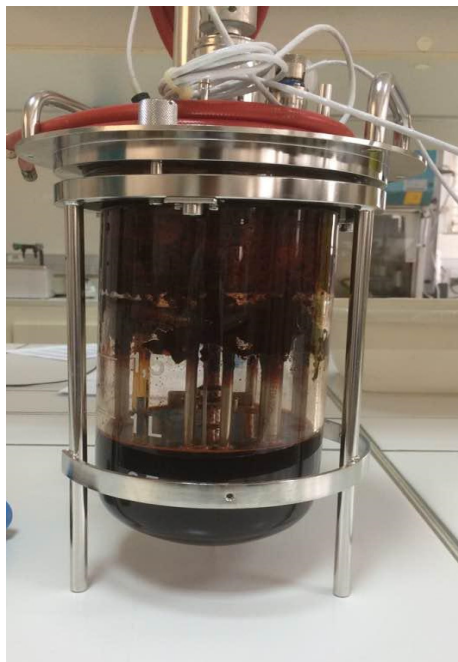

**Figure S1.** Pigment production of *T. albobiverticillius* 30548 in a 2 L stirred tank bioreactor on day 7 using PDB growth media cultured at 24 °C of pH 5.0, under the controlled agitation of 200 rpm with 50% pO<sub>2</sub>.
